# Supplementary material
Source: PubMed Central journal article supplement (PMC7963750)
Supplement: 17-00120.pdf [file 17-00120.pdf]

**On-line Table: Predictors of incomplete occlusion at last follow-up**

| Parameter                                                | Occlusion                   |                              | P Value |
|----------------------------------------------------------|-----------------------------|------------------------------|---------|
|                                                          | Complete<br>(n = 297) (No.) | Incomplete<br>(n = 83) (No.) |         |
| Sex                                                      |                             |                              |         |
| Female                                                   | 255 (79.4%)                 | 66 (20.6%)                   | .16     |
| Male                                                     | 42 (71.2%)                  | 17 (28.8%)                   |         |
| Age                                                      |                             |                              |         |
| 70 yr or younger                                         | 259 (80.9%)                 | 61 (19.1%)                   | .002    |
| Older than 70 yr                                         | 38 (63.3%)                  | 22 (36.7%)                   |         |
| Smoking                                                  |                             |                              |         |
| Yes                                                      | 97 (87.4%)                  | 14 (12.6%)                   | .005    |
| No                                                       | 200 (74.3%)                 | 69 (25.7%)                   |         |
| Multiple aneurysms                                       |                             |                              |         |
| Yes                                                      | 157 (79.3%)                 | 41 (20.7%)                   | .58     |
| No                                                       | 140 (76.9%)                 | 42 (23.1%)                   |         |
| Aneurysm location                                        |                             |                              |         |
| Anterior circulation                                     | 240 (81.1%)                 | 56 (18.9%)                   | .01     |
| PcomA/posterior circulation                              | 57 (67.9%)                  | 27 (32.1%)                   |         |
| Aneurysm shape                                           |                             |                              |         |
| Saccular                                                 | 201 (78.2%)                 | 56 (21.8%)                   | .2      |
| Blister                                                  | 11 (100%)                   | 0                            |         |
| Fusiform                                                 | 76 (74.5%)                  | 26 (25.5%)                   |         |
| Dissecting                                               | 9 (90%)                     | 1 (10%)                      |         |
| Aneurysm measurements                                    |                             |                              |         |
| Maximal diameter <sup>a</sup>                            |                             |                              |         |
| 1–20 mm                                                  | 269 (80.1%)                 | 67 (19.9%)                   | .03     |
| ≥21 mm                                                   | 21 (63.6%)                  | 12 (36.4%)                   |         |
| Neck size (for saccular aneurysms) <sup>b</sup>          |                             |                              |         |
| 1–6 mm                                                   | 152 (80%)                   | 38 (20%)                     | .09     |
| ≥7 mm                                                    | 17 (65.4%)                  | 9 (34.6%)                    |         |
| Dome-to-neck ratio (for saccular aneurysms) <sup>b</sup> |                             |                              |         |
| <2                                                       | 122 (80.3%)                 | 30 (19.7%)                   | .4      |
| ≥2                                                       | 61 (75.3%)                  | 20 (24.7%)                   |         |
| Daughter sac                                             |                             |                              |         |
| Yes                                                      | 68 (72.3%)                  | 26 (27.7%)                   | .12     |
| No                                                       | 229 (80.1%)                 | 57 (19.9%)                   |         |
| Subarachnoid hemorrhage                                  |                             |                              |         |
| No                                                       | 256 (77.1%)                 | 76 (22.9%)                   | .18     |
| Immediate (<2 wk)                                        | 11 (100%)                   | 0                            |         |
| Remote (>2 wk)                                           | 30 (81.1%)                  | 7 (18.9%)                    |         |
| Prior treatment                                          |                             |                              |         |
| No                                                       | 263 (78%)                   | 74 (22%)                     | .32     |
| Endovascular                                             | 26 (78.8%)                  | 7 (21.2%)                    |         |
| Surgery                                                  | 6 (100%)                    | 0                            |         |
| Both                                                     | 2 (50%)                     | 2 (50%)                      |         |
| Pretreatment mRS                                         |                             |                              |         |
| 0–2                                                      | 283 (78%)                   | 80 (22%)                     | .67     |
| 3–5                                                      | 14 (82.4%)                  | 3 (17.6%)                    |         |
| Platelet function test                                   |                             |                              |         |
| Yes                                                      | 268 (78.1%)                 | 80 (21.9%)                   | .97     |
| No                                                       | 11 (78.6%)                  | 3 (21.4%)                    |         |
| Clopidogrel responder                                    |                             |                              |         |
| Yes                                                      | 203 (77.8%)                 | 58 (22.2%)                   | .79     |
| No                                                       | 83 (79%)                    | 22 (21%)                     |         |
| Nonresponders' treatment                                 |                             |                              |         |
| Switch to ticagrelor                                     | 26 (78.8%)                  | 7 (21.2%)                    | .42     |
| Clopidogrel boost                                        | 31 (73.8%)                  | 11 (26.2%)                   |         |
| Same dose of clopidogrel                                 | 26 (86.7%)                  | 4 (13.3%)                    |         |
| Length of follow-up                                      |                             |                              |         |
| <12 mo                                                   | 124 (70.9%)                 | 51 (29.1%)                   | .001    |
| ≥12 mo                                                   | 173 (84.4%)                 | 32 (15.6%)                   |         |

**Note:**—PcomA indicates posterior communicating artery.

<sup>a</sup> Data are missing for 11 aneurysms.

<sup>b</sup> Data are missing for 41 aneurysms.
